# Supplementary material for: Effect of sunlight exposure on cognitive function among depressed and non-depressed participants: a REGARDS cross-sectional study
Source: Springer Nature journal article supplement (doi:10.1186/1476-069x-8-34), 2009-07-28

Probability of Cognitive Impairment

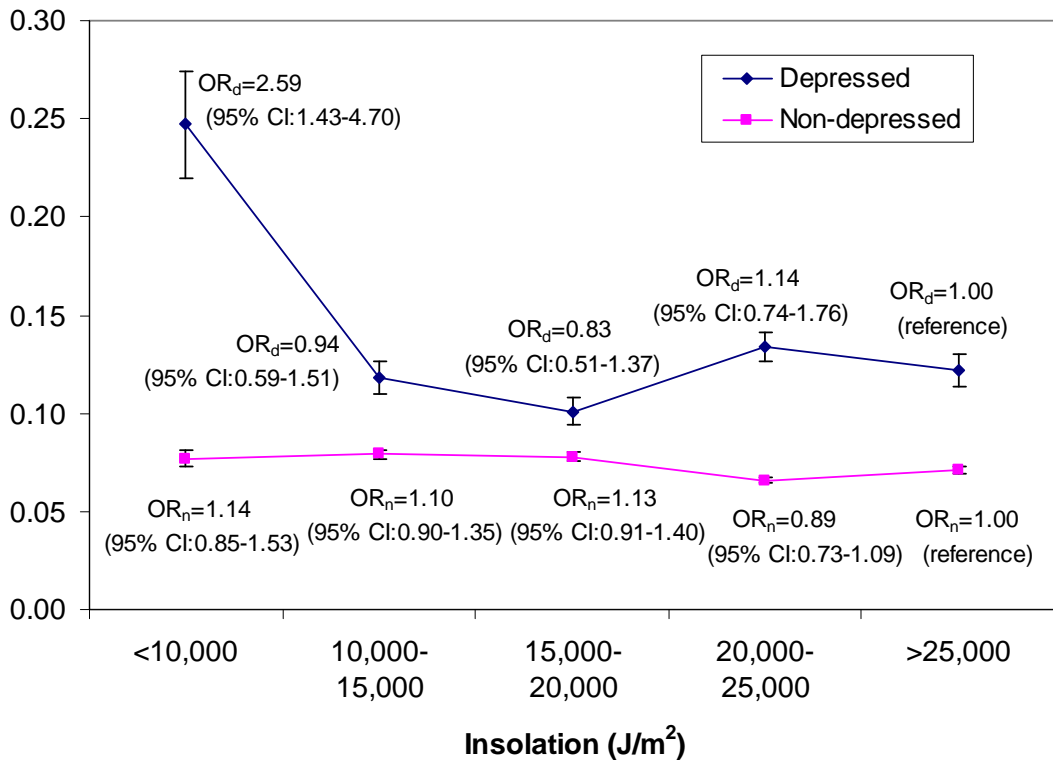

Supplement: 12940_2009_253_MOESM1_ESM.pdf [file 12940_2009_253_MOESM1_ESM.pdf]
